# Supplementary material for: Developmental changes in head movement kinematics during swimming inXenopus laevistadpoles
Source: Oxford University Press journal article supplement (doi:10.1242/jeb.146449), 2016-01-01
Supplement: jeb146449supp.pdf [file jeb146449supp.pdf]

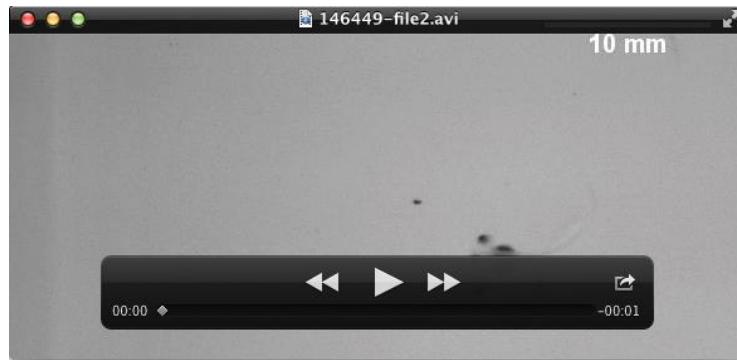

**Supplemental video 1.** Example swimming episode of a 13 mm, stage 47 tadpole shown at 200 frames per second. The associated kinematic parameters are shown on the left in Fig. 3.

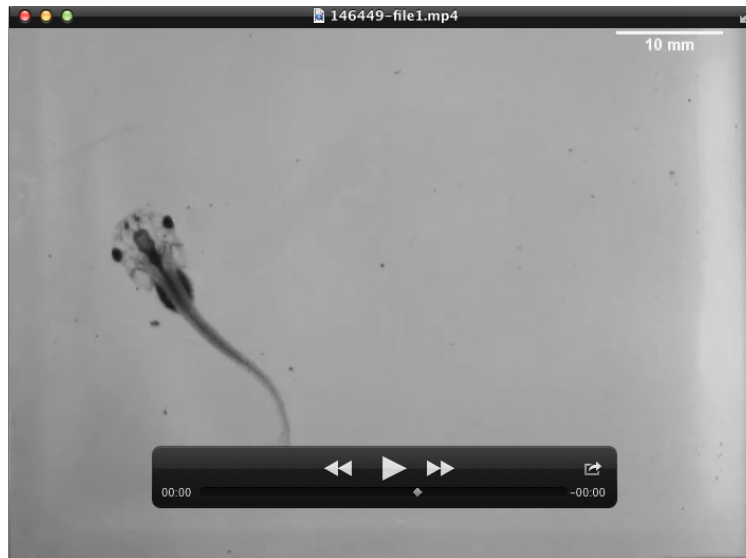

**Supplemental video 2.** Example swimming episode of a 38 mm, stage 53 tadpole shown at 200 frames per second. The associated kinematic parameters are shown on the right in Fig. 3.
